# Supplementary material for: Research and development from the bottom up - introduction of terminologies for new product development in emerging markets
Source: Springer Nature journal article supplement (doi:10.1186/2192-5372-3-9), 2014-01-01
Supplement: 13731_2013_35_MOESM2_ESM.pdf [file 13731_2013_35_MOESM2_ESM.pdf]

### **Jugaad**

BoP-focus (as environment)  
Problem-oriented  
Inventive problem-solving  
Frugal approach  
Low taxonomy and discipline  
Short time, rapidness

### **Frugal Innovation**

BoP-focus (as market)  
Product (solution)-oriented  
Cost/ function cutting  
Partly ecological  
Frugality, simplicity

### **Frugal Engineering/ Constraint-based In.**

BoP-focus (as environment)  
Process-oriented  
Frugal approach in R&D  
Cost cutting  
Creating/ modifying int. capabilities

### **Gandhian Innovation**

BoP-Focus (as environment)  
Social claim  
Knowledge transfer (techno.)  
Creating/ modifying int. capabilities  
Frugality, simplicity

### **Grass roots Innovation**

BoP-focus (as environment)  
Problem-oriented  
Inventive problem-solving  
Social claim; networking  
Knowledge transfer (techno./ idea)  
Frugality  
Ecological comprehension

### **Indigenous Innovation**

BoP-focus (as environment)  
Knowledge transfer (techno.)  
Modifying int. capabilities  
Social claim

### **Catalytic Innovation**

BoP-focus (as environment)  
Social claim  
Frugality  
Changing existing business patterns  
Underestimation by competitors

### **Reverse Innovation**

BoP-focus (as source)  
Product (solution)-oriented  
Knowledge transfer (process)  
Cost cutting
