# Supplementary material for: Research and development from the bottom up - introduction of terminologies for new product development in emerging markets
Source: Springer Nature journal article supplement (doi:10.1186/2192-5372-3-9), 2014-01-01
Supplement: 13731_2013_35_MOESM3_ESM.pdf [file 13731_2013_35_MOESM3_ESM.pdf]

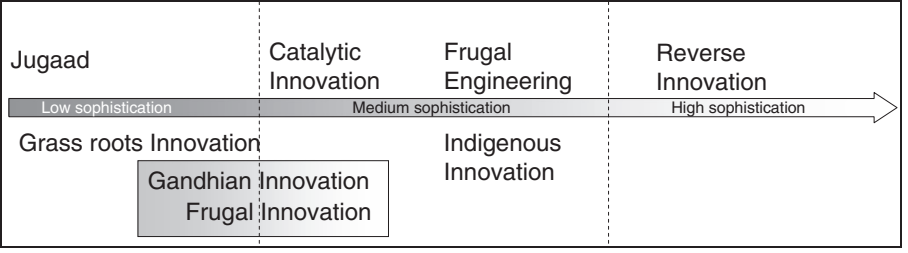

Jugaad

Catalytic  
Innovation

Frugal  
Engineering

Reverse  
Innovation

Low sophistication

Medium sophistication

High sophistication

Grass roots Innovation

Indigenous  
Innovation

Gandhian Innovation  
Frugal Innovation
