# Supplementary material for: Research and development from the bottom up - introduction of terminologies for new product development in emerging markets
Source: Springer Nature journal article supplement (doi:10.1186/2192-5372-3-9), 2014-01-01
Supplement: 13731_2013_35_MOESM4_ESM.pdf [file 13731_2013_35_MOESM4_ESM.pdf]

Jugaad  
Reverse  
Innovation

Gandhian  
Innovation (s)

Catalytic  
Innovation (s)

Grass roots  
Innovation (se)

Low (no claim included)

Medium (one claim focused)

High (both claims focused)

Frugal  
Engineering

Frugal  
Innovation (e)

Indigenous  
Innovation (s)
