# Supplementary material for: Research and development from the bottom up - introduction of terminologies for new product development in emerging markets
Source: Springer Nature journal article supplement (doi:10.1186/2192-5372-3-9), 2014-01-01

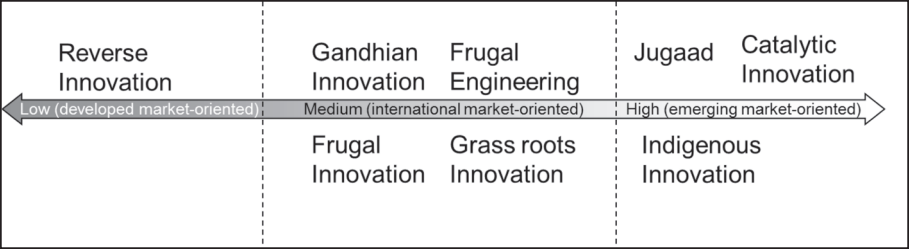

Supplement: 13731_2013_35_MOESM5_ESM.pdf [file 13731_2013_35_MOESM5_ESM.pdf]
